# Supplementary material for: Emerging investigator series: Inactivation of antibiotic resistant bacteria and inhibition of horizontal resistance gene transfer is more effective by 222 than 254 nm UV
Source: Royal Society of Chemistry journal article supplement (doi:10.1039/d4ew00530a), 2024-11-19
Supplement: d4ew00530a1.pdf [file d4ew00530a1.pdf]

## **Inactivation of antibiotic resistant bacteria and inhibition of horizontal resistance gene transfer is more effective by 222 than 254 nm UV**

Yijing Liu<sup>1</sup>, Natalie M. Hull<sup>1,2\*</sup>

<sup>1</sup> College of Engineering, Department of Civil, Environmental and Geodetic Engineering, The Ohio State University, Columbus, OH 43210, USA

<sup>2</sup>The Sustainability Institute, The Ohio State University, Columbus, OH, 43210, USA

\*Corresponding author: [hull.305@osu.edu](mailto:hull.305@osu.edu), current email: [nataliehull@boisestate.edu](mailto:nataliehull@boisestate.edu)

### **Keywords:**

UV Disinfection, Antibiotic Resistant Bacteria, Antibiotic Resistance Gene, Far-UVC Disinfection, Antimicrobial Resistance, Water Treatment, Waterborne Pathogens

## Supplemental Material

Table S1 Summarized log logistic parameters fitting to UV dose curves for ARB inactivation, extracted and intracellular gene damage and HGT inhibition with kinetic information

| Target         | UV Source | Condition     | b(cm <sup>2</sup> /mJ per log reduction) | d (log reduction) | e (mJ/cm <sup>2</sup> ) | D <sub>1</sub> (mJ/cm <sup>2</sup> ) | D <sub>2</sub> (mJ/cm <sup>2</sup> ) |
|----------------|-----------|---------------|------------------------------------------|-------------------|-------------------------|--------------------------------------|--------------------------------------|
| Cells          | 222 nm    | Inactivation  | -0.67±0.04                               | 10.66±0.97        | 119.29±32.54            | 4.11                                 | 28.61                                |
| Cells          | 254 nm    |               | -0.64±0.14                               | 21.57±0.17        | 998.89±12.55            | 8.99                                 | 13.54                                |
| 1017 bp        | 222 nm    | Extracellular | -0.44±0.10                               | 8.73±5.00         | 394.21±919.16           | 3.85                                 | 33.05                                |
| 870 bp         |           | Extracellular | -0.65±0.07                               | 5.30±0.80         | 88.99±42.91             | 9.50                                 | 40.82                                |
| 832 bp         |           | Extracellular | -0.54±0.11                               | 9.36±7.53         | 721.54±1743.74          | 14.24                                | 72.87                                |
| 266 bp         |           | Extracellular | -0.53±0.10                               | 9.09±6.69         | 1054.59±2225.60         | 20.67                                | 126.03                               |
| 1017 bp        |           | Intracellular | -0.47±0.16                               | 12.09±13.82       | 702.48±2882.74          | 4.03                                 | 25.26                                |
| 870 bp         |           | Intracellular | -1.0670.23                               | 3.66±0.36         | 23.10±5.49              | 9.25                                 | 41.25                                |
| 832 bp         |           | Intracellular | -0.71±0.09                               | 4.56±0.76         | 72.12±36.44             | 12.21                                | 64.91                                |
| 266 bp         |           | Intracellular | -0.66±0.12                               | 8.40±6.38         | 657.94±1156.39          | 32.40                                | 97.51                                |
| 1017 bp        | 254 nm    | Extracellular | -0.52±0.20                               | 14.17±23.31       | 1070.48±5262.33         | 7.47                                 | 42.94                                |
| 870 bp         |           | Extracellular | -0.90±0.07                               | 4.73±0.37         | 57.61±11.58             | 13.33                                | 57.51                                |
| 832 bp         |           | Extracellular | -0.56±0.03                               | 6.98±1.39         | 372.15±234.23           | 15.19                                | 91.99                                |
| 266 bp         |           | Extracellular | -0.49±0.30                               | 6.34±11.78        | 620.72±3898.87          | 19.80                                | 150.79                               |
| 1017 bp        |           | Intracellular | -0.57±0.07                               | 14.60±8.92        | 1054.19±1681.70         | 3.85                                 | 21.82                                |
| 870 bp         |           | Intracellular | -0.56±0.10                               | 11.61±9.49        | 956.89±2171.48          | 9.50                                 | 27.48                                |
| 832 bp         |           | Intracellular | -0.73±0.12                               | 9.58±7.32         | 574.23±943.64           | 14.24                                | 51.15                                |
| 266 bp         |           | Intracellular | -1.12±0.26                               | 3.54±1.35         | 119.53±83.69            | 20.67                                | 114.33                               |
| HGT Inhibition | 254 nm    | Extracellular | -0.88±0.53                               | 3.04±3.08         | 112.59±264.52           | 8.57                                 | 236.81                               |
|                | 222 nm    |               | -0.48±0.19                               | 5.51±4.13         | 191.98±568.91           | 50.23                                | 60.14                                |
|                | 254 nm    | Intracellular | -1.33±0.19                               | 1.52±0.17         | 56.74±12.55             | 20.14                                | NA                                   |
|                | 222 nm    |               | -0.62±0.10                               | 13.14±9.55        | 1094.24±1819.24         | 92.90                                | 70.07                                |

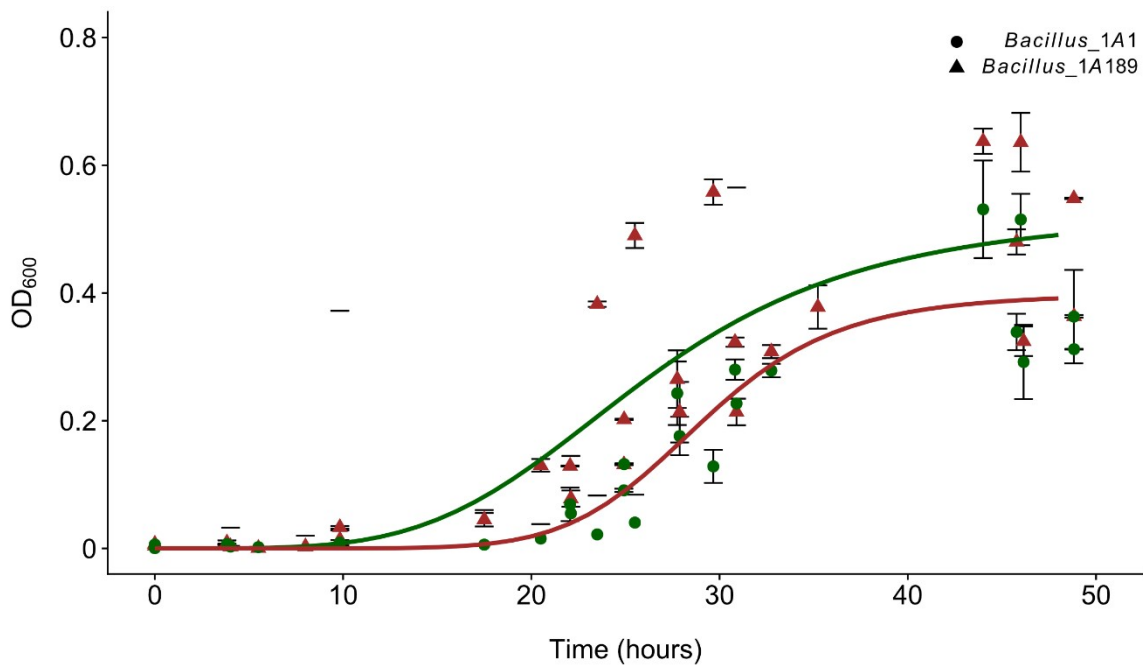

Figure S1 Growth curves (OD vs. time) for *B.subtilis* 1A189 (green) and *B.subtilis* 1A1 (red). Error bars represent SEM of three averaged biological replicates, with three technical replicates each, at each collecting time. Modeled parameters are shown in Table S2.

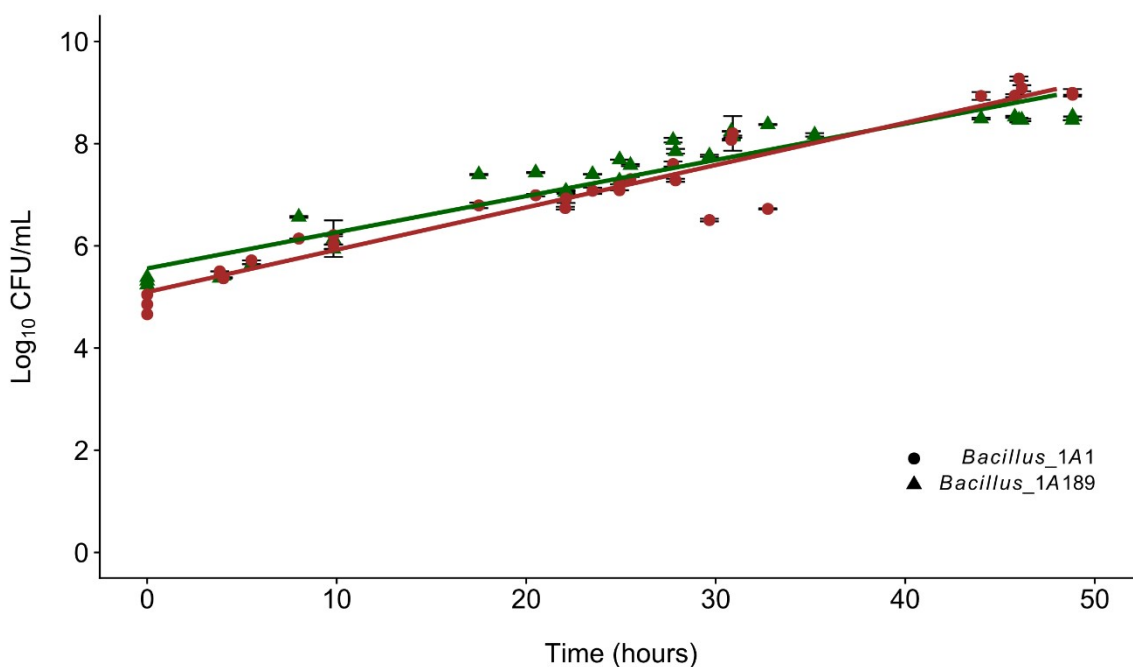

Figure S2 Growth curves ( $\text{Log}_{10}$  CFU/mL vs. time) for *B.subtilis* 1A189 (green) and *B.subtilis* 1A1 (red). Error bars represent SEM of three averaged biological replicates, with three technical replicates each, at each collecting time. Modeled parameters are shown in Table S3.

Table S2. Summary of four parameter estimates with their corresponding standard deviation of log logistic model depicting the growth curve of OD at 600 nm over time curve for *B.subtilis* 1A189 and *B.subtilis* 1A1

| <i>B.subtilis</i> | b (1/hour)       | d ( $\text{OD}_{600}$ ) | e (hour)         |
|-------------------|------------------|-------------------------|------------------|
| 1A189             | $-4.29 \pm 2.06$ | $0.52 \pm 0.09$         | $26.02 \pm 3.02$ |
| 1A1               | $-8.01 \pm 1.96$ | $0.39 \pm 0.02$         | $29.09 \pm 1.01$ |

Table S3. Summary of slope and intercept of linear model with their corresponding standard deviation depicting the growth curve of  $\text{Log}_{10}$  CFU/mL over time for *B.subtilis* 1A189 and *B.subtilis* 1A1

| <i>B.subtilis</i> | Slope ( $\text{log}_{10}\text{CFU/mL/hour}$ ) | Intercept ( $\text{log}_{10}\text{CFU/mL}$ ) |
|-------------------|-----------------------------------------------|----------------------------------------------|
| 1A189             | $0.07 \pm 0.001$                              | $5.55 \pm 0.12$                              |
| 1A1               | $0.08 \pm 0.001$                              | $5.09 \pm 0.12$                              |

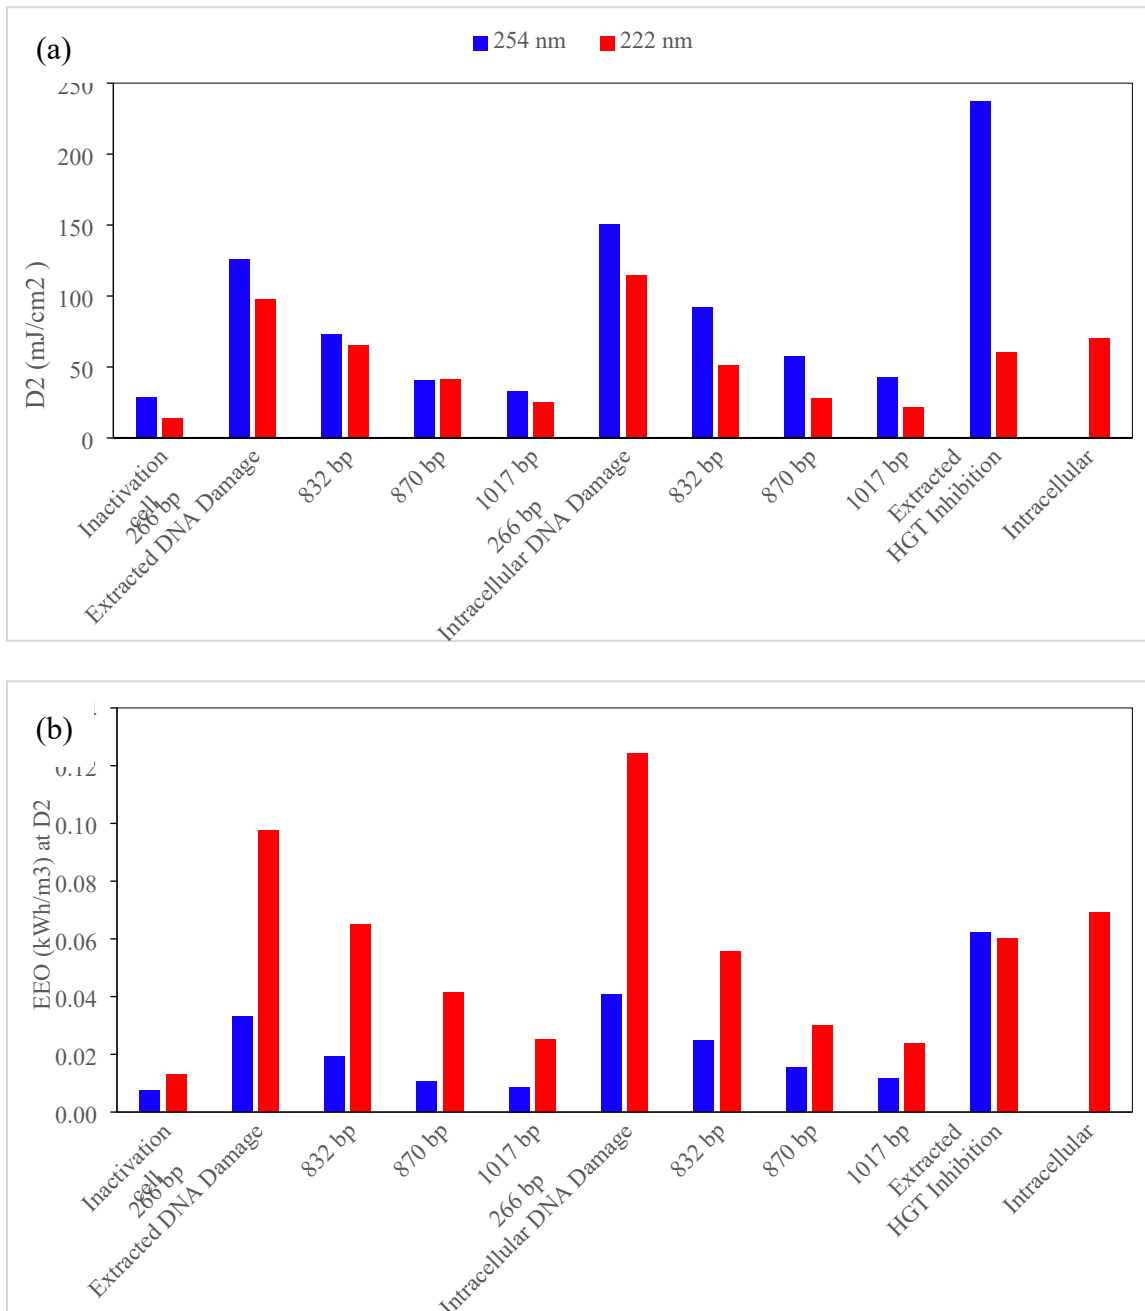

Figure S3 (a) D<sub>2</sub> for 1-log<sub>10</sub> reduction and (b) Electrical Energy per Order at D<sub>2</sub> of: cell inactivation, extracted DNA damage at various amplicon lengths, intracellular DNA damage at various amplicon lengths, and HGT inhibition of intracellular and extracted DNA with 254 nm (blue) and 222 nm (red) UV.
